# Supplementary material for: Conjugates of Chitosan with β-Cyclodextrins as Promising Carriers for the Delivery of Levofloxacin: Spectral and Microbiological Studies
Source: MDPI journal article supplement (doi:10.3390/life13020272), 2023-01-18
Supplement: s1 [file s1]

## Supplementary Materials

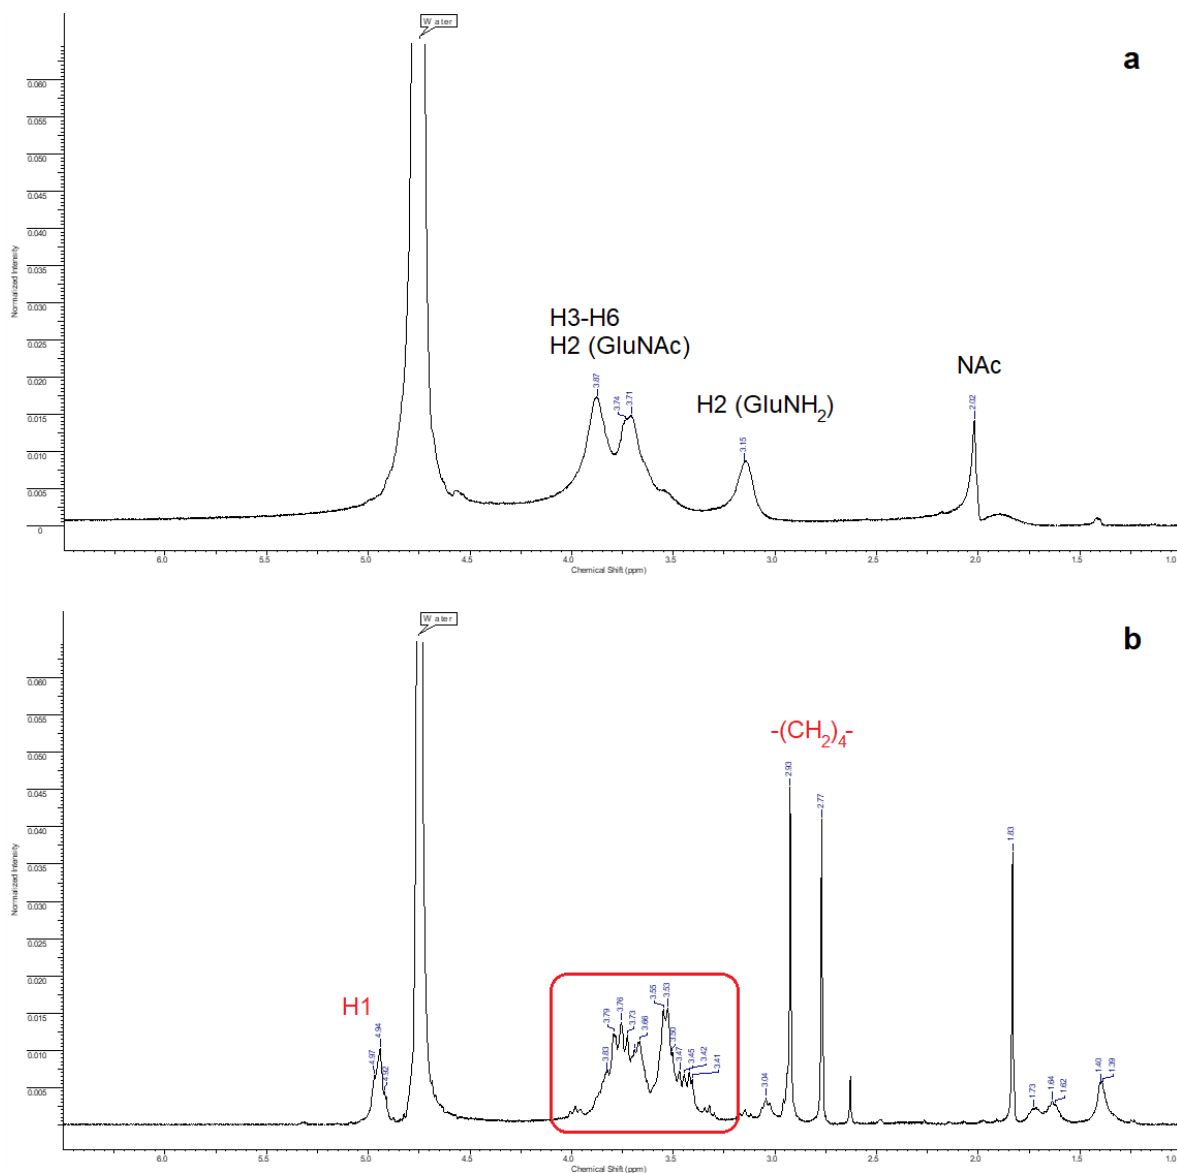

**Figure S1.** <sup>1</sup>H NMR spectra of Chit (**a**) and NH<sub>2</sub>-CD-Chit (**b**), D<sub>2</sub>O, 400 MHz.
